# Supplementary material for: Cardiac and Vascular α1-Adrenoceptors in Congestive Heart Failure: A Systematic Review
Source: PubMed Central journal article supplement (PMC7694190; doi:10.3390/cells9112412), 2020-11-04
Supplement: cells-09-02412-s001.pdf [file cells-09-02412-s001.pdf]

Adrenoceptor"[tw] OR "alpha1A Adrenoceptors"[tw] OR "alpha1B Adrenoceptor"[tw] OR "alpha1B Adrenoceptors"[tw] OR "alpha1C Adrenoceptor"[tw] OR "alpha1C Adrenoceptors"[tw] OR "alpha1D Adrenoceptor"[tw] OR "alpha1D Adrenoceptors"[tw] OR ("alpha"[ti] OR alpha\*[ti]) AND (adrenoceptor\*[ti] OR adrenoceptor\*[ti] OR adrenergic receptor\*[ti])) OR "peripheral sympathetic vasoconstriction"[tw])) OR (("smooth muscle"[ti] OR "Muscle, Smooth, Vascular"[majr]) AND ("vascular"[ti] OR "aortic"[ti] OR "vasoactive"[tw]) AND ("Receptors, Adrenergic, alpha 1"[majr] OR "Adrenergic alpha 1 Receptor"[ti] OR "Adrenergic alpha 1 Receptors"[ti] OR "Adrenergic alpha 1A Receptor"[ti] OR "Adrenergic alpha 1A Receptors"[ti] OR "Adrenergic alpha 1B Receptor"[ti] OR "Adrenergic alpha 1B Receptors"[ti] OR "Adrenergic alpha 1D Receptor"[ti] OR "Adrenergic alpha 1D Receptors"[ti] OR "alpha 1 Adrenergic Receptor"[ti] OR "alpha 1 Adrenergic Receptors"[ti] OR "alpha 1A Adrenergic Receptor"[ti] OR "alpha 1A Adrenergic Receptors"[ti] OR "alpha 1B Adrenergic Receptor"[ti] OR "alpha 1B Adrenergic Receptors"[ti] OR "alpha 1C Adrenergic Receptor"[ti] OR "alpha 1C Adrenergic Receptors"[ti] OR "alpha 1D Adrenergic Receptor"[ti] OR "alpha 1D Adrenergic Receptors"[ti] OR "alpha1 Adrenergic Receptor"[ti] OR "alpha1 Adrenergic Receptors"[ti] OR "alpha1A Adrenergic Receptor"[ti] OR "alpha1A Adrenergic Receptors"[ti] OR "alpha1B Adrenergic Receptor"[ti] OR "alpha1B Adrenergic Receptors"[ti] OR "alpha1C Adrenergic Receptor"[ti] OR "alpha1C Adrenergic Receptors"[ti] OR "alpha1D Adrenergic Receptor"[ti] OR "alpha1D Adrenergic Receptors"[ti] OR "alpha1 Adrenoceptor"[ti] OR "alpha1 Adrenoceptors"[ti] OR "alpha 1 Adrenoceptor"[ti] OR "alpha 1 Adrenoceptors"[ti] OR "alpha 1A Adrenoceptor"[ti] OR "alpha 1A Adrenoceptors"[ti] OR "alpha 1B Adrenoceptor"[ti] OR "alpha 1B Adrenoceptors"[ti] OR "alpha 1C Adrenoceptor"[ti] OR "alpha 1C Adrenoceptors"[ti] OR "alpha 1D Adrenoceptor"[ti] OR "alpha 1D Adrenoceptors"[ti] OR "alpha1 Adrenoceptor"[ti] OR "alpha1 Adrenoceptors"[ti] OR "alpha 1 Adrenoceptor"[ti] OR "alpha 1 Adrenoceptors"[ti] OR "alpha 1A Adrenoceptor"[ti] OR "alpha 1A Adrenoceptors"[ti] OR "alpha 1B Adrenoceptor"[ti] OR "alpha 1B Adrenoceptors"[ti] OR "alpha 1C Adrenoceptor"[ti] OR "alpha 1C Adrenoceptors"[ti] OR "alpha 1D Adrenoceptor"[ti] OR "alpha 1D Adrenoceptors"[ti] OR ("alpha"[ti] OR alpha\*[ti]) AND (adrenoceptor\*[ti] OR adrenoceptor\*[ti] OR adrenergic receptor\*[ti])) OR "peripheral sympathetic vasoconstriction"[ti])) OR (("Heart Failure"[majr] OR "heart failure"[ti] OR "cardiac failure"[ti] OR "myocardial failure"[ti] OR "heart decompensation"[ti] OR "heart decompensation"[ti] OR "cardio-renal syndrome"[ti] OR "cardiorenal syndrome"[ti] OR "paroxysmal dyspnea"[ti] OR "cardiac edema"[ti] OR "cardiac oedema"[ti] OR "heart edema"[ti] OR "heart oedema"[ti] OR "failing myocardium"[ti] OR "failing heart"[ti] OR "failing human myocardium"[ti] OR "failing human heart"[ti]) AND (norepinephrine\*[ti] OR "Norepinephrine/pharmacology"[majr]))))
